# Supplementary material for: Time to Continuous Renal Replacement Therapy Initiation and 90-Day Major Adverse Kidney Events in Children and Young Adults
Source: PubMed Central journal article supplement (PMC10762580; doi:10.1001/jamanetworkopen.2023.49871), 2024-01-02
Supplement: jamanetwopen-e2349871-s002.pdf [file jamanetwopen-e2349871-s002.pdf]

\*First name, last name, and suffix (if applicable) are required and will appear in PubMed.

| <b>*Group Name(s): WE-ROCK Investigators</b> |                   |                              |                         |                                                                                             |                                                 |                                                                |                                                                                                   |
|----------------------------------------------|-------------------|------------------------------|-------------------------|---------------------------------------------------------------------------------------------|-------------------------------------------------|----------------------------------------------------------------|---------------------------------------------------------------------------------------------------|
| <b>*First Name and Middle Initial(s)</b>     | <b>*Last Name</b> | <b>*Suffix (eg, Jr, III)</b> | <b>Academic Degrees</b> | <b>Institution</b>                                                                          | <b>Location (city, state/province, country)</b> | <b>Role or Contribution, eg, chair, principal investigator</b> | <b>Group (if more than 1 Group listed in the byline) and/or Subgroup (eg, Steering Committee)</b> |
| Emily                                        | Ahern             |                              | CPNP, DNP               | Children's Hospital Colorado, University of Colorado School of Medicine,                    | Aurora, CO, USA                                 | Data collection, manuscript review                             |                                                                                                   |
| Ayse                                         | Akcan Arikan      |                              | MD                      | Baylor College of Medicine, Texas Children's Hospital                                       | Houston, TX, USA                                | Data collection, manuscript review                             |                                                                                                   |
| Issa                                         | Alhamoud          |                              | MD                      | University of Iowa Stead Family Children's Hospital, Carver College of Medicine             | Iowa City, IA, USA                              | Data collection, manuscript review                             |                                                                                                   |
| Rashid                                       | Alobaidi          |                              | MD                      | Univeristy of Alberta, Stollery Children's Hospital                                         | Edmonton, Alberta, Canada                       | Data collection, manuscript review                             |                                                                                                   |
| Shanthi S                                    | Balani            |                              | MD                      | University of Minnesota                                                                     | Minneapolis, MN, USA                            | Data collection, manuscript review                             |                                                                                                   |
| Matthew                                      | Barhight          |                              | MD, MS                  | Ann and Robert H. Lurie Children's Hospital of Chicago                                      | Chicago IL, USA                                 | Data collection, manuscript review                             |                                                                                                   |
| Abby                                         | Basalely          |                              | MD                      | Cohen Children's Medical Center, Zucker School of Medicine,                                 | Hyde Park, NY, USA                              | Data collection, manuscript review                             |                                                                                                   |
| Gabriella                                    | Bottari           |                              | MD                      | Bambino Gesù Children's Hospital, IRCCS                                                     | Rome, Italy                                     | Data collection, manuscript review                             |                                                                                                   |
| Andrea                                       | Cappoli           |                              | MD                      | Bambino Gesù Children's Hospital, IRCCS                                                     | Rome, Italy                                     | Data collection, manuscript review                             |                                                                                                   |
| Eileen A                                     | Ciccia            |                              | MD                      | Washington University School of Medicine, St. Louis Children's                              | St Louis, MO, USA                               | Data collection, manuscript review                             |                                                                                                   |
| Michaela                                     | Collins           |                              | BA                      | Cincinnati Children's Hospital Medical Center; University of Cincinnati College of Medicine | Cincinnati OH, USA                              | Data collection, manuscript review                             |                                                                                                   |

## Supplemental Online Content: Nonauthor Collaborators

\*First name, last name, and suffix (if applicable) are required and will appear in PubMed.

| *First Name and Middle Initial(s) | *Last Name        | *Suffix (eg, Jr, III) | Academic Degrees | Institution                                                                            | Location (city, state/province, country) | Role or Contribution, eg, chair, principal investigator | Group (if more than 1 Group listed in the byline) and/or Subgroup (eg, Steering Committee) |
|-----------------------------------|-------------------|-----------------------|------------------|----------------------------------------------------------------------------------------|------------------------------------------|---------------------------------------------------------|--------------------------------------------------------------------------------------------|
| Denise                            | Colosimo          |                       | MD               | Meyer Children's Hospital, IRCCS                                                       | Florence, Italy                          | Data collection, manuscript review                      |                                                                                            |
| Mihaela A                         | Damian            |                       | MD, MPH          | Stanford University School of Medicine                                                 | Palo Alto, CA, USA                       | Data collection, manuscript review                      |                                                                                            |
| Gabrielle                         | DeAbreu           |                       | MD               | Cohen Children's Medical Center, Zucker School of Medicine                             | Hyde Park, NY, USA                       | Data collection, manuscript review                      |                                                                                            |
| Kathy L                           | Ding              |                       | BS               | University of Colorado, School of Medicine                                             | Aurora, CO, USA                          | Data collection, manuscript review                      |                                                                                            |
| Kristin J                         | Dolan             |                       | MD               | Mercy Children's Hospital and Baylor College of Medicine, Texas Children's Hospital    | Kansas City, MO and Houston, TX, USA     | Data collection, manuscript review                      |                                                                                            |
| Sarah N                           | Fernandez LaFever |                       | Md, PhD          | Gregorio Marañón University Hospital; School of Medicine,                              | Madrid, Spain                            | Data collection, manuscript review                      |                                                                                            |
| Dana Y                            | Fuhrman           |                       | MD, MS           | University of Pittsburgh Medical Center Children's Hospital of Pittsburgh              | Pittsburgh, PA, USA                      | Data collection, manuscript review                      |                                                                                            |
| Francesco                         | Guzzi             |                       | MD               | Santo Stefano Hospital                                                                 | Prato, Italy                             | Data collection, manuscript review                      |                                                                                            |
| Taiki                             | Haga              |                       | MD               | Osaka City General Hospital                                                            | Osaka, Japan                             | Data collection, manuscript review                      |                                                                                            |
| Elizabeth                         | Harvey            |                       | MD               | Hospital for Sick Children                                                             | Toronto, Ontario, Canada                 | Data collection, manuscript review                      |                                                                                            |
| Denise C                          | Hasson            |                       | MD               | Cincinnati Children's Hospital and NYU Langone Health, Hassenfeld Children's Hospital, | Cincinnati OH, and New York, NY, USA     | Data collection, manuscript review                      |                                                                                            |
| Taylor                            | Hill-Horowitz     |                       | BS               | Cohen Children's Medical Center, Zucker School of Medicine,                            | Hyde Park, NY, USA                       | Data collection, manuscript review                      |                                                                                            |
| Haleigh                           | Inthavong         |                       | BS, MS           | Baylor College of Medicine, Texas Children's Hospital                                  | Houston, TX, USA                         | Data collection, manuscript review                      |                                                                                            |

## Supplemental Online Content: Nonauthor Collaborators

\*First name, last name, and suffix (if applicable) are required and will appear in PubMed.

| *First Name and Middle Initial(s) | *Last Name  | *Suffix (eg, Jr, III) | Academic Degrees | Institution                                                                                 | Location (city, state/province, country) | Role or Contribution, eg, chair, principal investigator | Group (if more than 1 Group listed in the byline) and/or Subgroup (eg, Steering Committee) |
|-----------------------------------|-------------|-----------------------|------------------|---------------------------------------------------------------------------------------------|------------------------------------------|---------------------------------------------------------|--------------------------------------------------------------------------------------------|
| Catherine                         | Joseph      |                       | MD               | Baylor College of Medicine, Texas Children's Hospital                                       | Houston, TX, USA                         | Data collection, manuscript review                      |                                                                                            |
| Ahmad                             | Kaddourah   |                       | MD, MS           | Sidra Medicine and Weil Cornell Medicine                                                    | Doha, Qatar                              | Data collection, manuscript review                      |                                                                                            |
| Aadil                             | Kakajiwala  |                       | MD               | Children's National Hospital                                                                | Washington DC, USA                       | Data collection, manuscript review                      |                                                                                            |
| Aaron D                           | Kessel      |                       | MD, MS           | Cohen Children's Medical Center, Zucker School of Medicine,                                 | Hyde Park, NY, USA                       | Data collection, manuscript review                      |                                                                                            |
| Sarah                             | Korn        |                       | DO               | Westchester Medical Center                                                                  | Westchester, NY, USA                     | Data collection, manuscript review                      |                                                                                            |
| Kelli A                           | Krallman    |                       | BSN, MS          | Cincinnati Children's Hospital Medical Center; University of Cincinnati College of Medicine | Cincinnati OH, USA                       | Data collection, manuscript review                      |                                                                                            |
| David M                           | Kwiatkowski |                       | MD, MSc          | Stanford University School of Medicine                                                      | Palo Alto, CA, USA                       | Data collection, manuscript review                      |                                                                                            |
| Jasmine                           | Lee         |                       | MSc              | Hospital for Sick Children                                                                  | Toronto, Ontario, Canada                 | Data collection, manuscript review                      |                                                                                            |
| Laurance                          | Lequier     |                       | MD               | Univeristy of Alberta, Stollery Children's Hospital                                         | Edmonton, Alberta, Canada                | Data collection, manuscript review                      |                                                                                            |
| Tina                              | Madani Kia  |                       | BS               | Univeristy of Alberta, Stollery Children's Hospital                                         | Edmonton, Alberta, Canada                | Data collection, manuscript review                      |                                                                                            |
| Eleonora                          | Marinari    |                       | MD               | Bambino Gesù Children's Hospital, IRCCS                                                     | Rome, Italy                              | Data collection, manuscript review                      |                                                                                            |
| Susan D                           | Martin      |                       | MD               | Golisano Children's Hospital at University of Rochester Medical Center                      | Rochester, NY, USA                       | Data collection, manuscript review                      |                                                                                            |

## Supplemental Online Content: Nonauthor Collaborators

\*First name, last name, and suffix (if applicable) are required and will appear in PubMed.

| *First Name and Middle Initial(s) | *Last Name   | *Suffix (eg, Jr, III) | Academic Degrees | Institution                                                                               | Location (city, state/province, country) | Role or Contribution, eg, chair, principal investigator | Group (if more than 1 Group listed in the byline) and/or Subgroup (eg, Steering Committee) |
|-----------------------------------|--------------|-----------------------|------------------|-------------------------------------------------------------------------------------------|------------------------------------------|---------------------------------------------------------|--------------------------------------------------------------------------------------------|
| Tahagod H                         | Mohamed      |                       | MD               | Nationwide Children's Hospital, The Ohio State University College of Medicine             | Columbus, OH, USA                        | Data collection, manuscript review                      |                                                                                            |
| Catherine                         | Morgan       |                       | MD               | Univeristy of Alberta, Stollery Children's Hospital                                       | Edmonton, Alberta, Canada                | Data collection, manuscript review                      |                                                                                            |
| Theresa                           | Mottes       |                       | APRN             | Ann and Robert H. Lurie Children's Hospital of Chicago                                    | Chicago IL, USA                          | Data collection, manuscript review                      |                                                                                            |
| Melissa A                         | Muff-Luett   |                       | MD               | University of Nebraska Medical Center, Children's Hospital & Medical Center,              | Omaha, NE, USA                           | Data collection, manuscript review                      |                                                                                            |
| Siva                              | Namachivayam |                       | MBBS             | Royal Children's Hospital, University of Melbourne, Murdoch Children's Research Institute | Melbourne, Victoria, Australia           | Data collection, manuscript review                      |                                                                                            |
| Tara M                            | Neumayr      |                       | MD               | Washington University School of Medicine, St. Louis Children's                            | St Louis, MO, USA                        | Data collection, manuscript review                      |                                                                                            |
| Jennifer                          | Nhan         |                       | MD               | Children's National Hospital                                                              | Washington DC, USA                       | Data collection, manuscript review                      |                                                                                            |
| Abigail                           | O'Rourke     |                       | MD               | Cohen Children's Medical Center, Zucker School of Medicine,                               | Hyde Park, NY, USA                       | Data collection, manuscript review                      |                                                                                            |
| Matthew G                         | Pinto        |                       | MD               | Maria Fareri Children's Hospital at Westchester Medical Center,                           | Westchester, NY, USA                     | Data collection, manuscript review                      |                                                                                            |
| Dua                               | Qutob        |                       | MD               | Sidra Medicine and Weil Cornell Medicine                                                  | Doha, Qatar                              | Data collection, manuscript review                      |                                                                                            |
| Valeria                           | Raggi        |                       | MD               | Bambino Gesù Children's Hospital, IRCCS                                                   | Rome, Italy                              | Data collection, manuscript review                      |                                                                                            |

## Supplemental Online Content: Nonauthor Collaborators

\*First name, last name, and suffix (if applicable) are required and will appear in PubMed.

| *First Name and Middle Initial(s) | *Last Name      | *Suffix (eg, Jr, III) | Academic Degrees | Institution                                                                                 | Location (city, state/province, country)                           | Role or Contribution, eg, chair, principal investigator | Group (if more than 1 Group listed in the byline) and/or Subgroup (eg, Steering Committee) |
|-----------------------------------|-----------------|-----------------------|------------------|---------------------------------------------------------------------------------------------|--------------------------------------------------------------------|---------------------------------------------------------|--------------------------------------------------------------------------------------------|
| Stephanie                         | Reynaud         |                       | MD               | Hospital for Sick Children and Hopital Bicetre, AHP Université Paris-Saclay                 | Toronto, Ontario, Canada and Kremlin-Bicetre, Val de Marne, France | Data collection, manuscript review                      |                                                                                            |
| Zaccaria                          | Ricci           |                       | MD               | Meyer Children's Hospital, IRCCS                                                            | Florence, Italy                                                    | Data collection, manuscript review                      |                                                                                            |
| Zachary A                         | Rumlow          |                       | DO               | University of Iowa Stead Family Children's Hospital, Carver College of Medicine             | Iowa City, IA, USA                                                 | Data collection, manuscript review                      |                                                                                            |
| María J                           | Santiago Lozano |                       | MD, PhD          | Gregorio Marañón University Hospital; School of Medicine                                    | Madrid, Spain                                                      | Data collection, manuscript review                      |                                                                                            |
| Emily                             | See             |                       | MBBS, PhD        | Royal Children's Hospital, University of Melbourne, Murdoch Children's Research Institute   | Melbourne, Victoria, Australia                                     | Data collection, manuscript review                      |                                                                                            |
| Carmela                           | Serpe           |                       | PhD              | Bambino Gesù Children's Hospital, IRCCS                                                     | Rome, Italy                                                        | Data collection, manuscript review                      |                                                                                            |
| Alyssa                            | Serratore       |                       | RN, MSc          | Royal Children's Hospital, University of Melbourne, Murdoch Children's Research Institute   | Melbourne, Victoria, Australia                                     | Data collection, manuscript review                      |                                                                                            |
| Ananya                            | Shah            |                       | BS               | University of Colorado, School of Medicine                                                  | Aurora, CO, USA                                                    | Data collection, manuscript review                      |                                                                                            |
| Weiwen V                          | Shih            |                       | MD               | University of Colorado, School of Medicine                                                  | Aurora, CO, USA                                                    | Data collection, manuscript review                      |                                                                                            |
| Cara L                            | Slagle          |                       | MD               | Cincinnati Children's Hospital Medical Center; University of Cincinnati College of Medicine | Cincinnati OH, USA                                                 | Data collection, manuscript review                      |                                                                                            |
| Sonia                             | Solomon         |                       | DO               | Westchester Medical Center, Westchester                                                     | Westchester, NY, USA                                               | Data collection, manuscript review                      |                                                                                            |

## Supplemental Online Content: Nonauthor Collaborators

\*First name, last name, and suffix (if applicable) are required and will appear in PubMed.

| *First Name and Middle Initial(s) | *Last Name | *Suffix (eg, Jr, III) | Academic Degrees | Institution                                                                                 | Location (city, state/province, country) | Role or Contribution, eg, chair, principal investigator | Group (if more than 1 Group listed in the byline) and/or Subgroup (eg, Steering Committee) |
|-----------------------------------|------------|-----------------------|------------------|---------------------------------------------------------------------------------------------|------------------------------------------|---------------------------------------------------------|--------------------------------------------------------------------------------------------|
| Danielle E                        | Soranno    |                       | MD               | Indiana University School of Medicine, Riley Hospital for Children                          | Indianapolis, IA, USA                    | Data collection, manuscript review                      |                                                                                            |
| Rachana                           | Srivastava |                       | MD               | Mattel Children's Hospital at UCLA                                                          | Los Angeles, CA, USA                     | Data collection, manuscript review                      |                                                                                            |
| Natalja L                         | Stanski    |                       | MD               | Cincinnati Children's Hospital Medical Center; University of Cincinnati College of Medicine | Cincinnati OH, USA                       | Data collection, manuscript review                      |                                                                                            |
| Michelle C                        | Starr      |                       | MD, MPH          | Indiana University School of Medicine, Riley Hospital for Children                          | Indianapolis, IA, USA                    | Data collection, manuscript review                      |                                                                                            |
| Erin K                            | Stenson    |                       | MD               | University of Colorado, School of Medicine                                                  | Aurora, CO, USA                          | Data collection, manuscript review                      |                                                                                            |
| Amy E                             | Strong     |                       | MD, MSCE         | University of Iowa Stead Family Children's Hospital, Carver College of Medicine             | Iowa City, IA, USA                       | Data collection, manuscript review                      |                                                                                            |
| Susan A                           | Taylor     |                       | MSc              | King's College Hospital                                                                     | London, England, United Kingdom          | Data collection, manuscript review                      |                                                                                            |
| Brynna                            | Van Wyk    |                       | ARNP, MSN        | University of Iowa Stead Family Children's Hospital, Carver College of Medicine             | Iowa City, IA, USA                       | Data collection, manuscript review                      |                                                                                            |
| Tennille N                        | Webb       |                       | MD, MSPH         | Children's of Alabama/University of Alabama at Birmingham                                   | Birmingham, AL, USA                      | Data collection, manuscript review                      |                                                                                            |
| Emily E                           | Zangla     |                       | DO               | University of Minnesota                                                                     | Minneapolis, MN, USA                     | Data collection, manuscript review                      |                                                                                            |
