# Supplementary material for: Time to Continuous Renal Replacement Therapy Initiation and 90-Day Major Adverse Kidney Events in Children and Young Adults
Source: PubMed Central journal article supplement (PMC10762580; doi:10.1001/jamanetworkopen.2023.49871), 2024-01-02
Supplement: jamanetwopen-e2349871-s003.pdf [file jamanetwopen-e2349871-s003.pdf]

## Data Sharing Statement

Gist. Time to Continuous Renal Replacement Therapy Initiation and 90-Day Major Adverse Kidney Events in Children and Young Adults. *JAMA Netw Open*. Published January 02, 2024. doi:10.1001/jamanetworkopen.2023.49871

### Data

**Data available:** No

### Additional Information

**Explanation for why data not available:** This data is part of an existing registry. Requests for ancillary studies can be made at the <https://www.werockstudy.org/>
